# Supplementary material for: Pb6Ba3Si2S8I10: a new thiohalide with a quasi-two-dimensional structure and wide band gap
Source: Royal Society of Chemistry journal article supplement (doi:10.1039/d4dt02315c), 2024-01-01
Supplement: d4dt02315c1.pdf [file d4dt02315c1.pdf]

## Electronic Supplementary Information

### **Pb<sub>6</sub>Ba<sub>3</sub>Si<sub>2</sub>S<sub>8</sub>I<sub>10</sub>: A new thiohalide with a quasi-two-dimensional structure and wide band gap**

Wang Zhao,<sup>a,b</sup> Jiazheng Zhou,<sup>a</sup> Linan Wang,<sup>a,b</sup> Wenqi Jin,<sup>a,b</sup> Yingying Kong,<sup>a</sup> Yu Chu<sup>a,b\*</sup> and Junjie Li<sup>a,b\*</sup>

*<sup>a</sup>Research Center for Crystal Materials; CAS Key Laboratory of Functional Materials and Devices for Special Environments, Xinjiang Technical Institute of Physics & Chemistry, CAS, Urumqi 830011, China*

*<sup>b</sup>Center of Materials Science and Optoelectronics Engineering, University of Chinese Academy of Sciences, Beijing 100049, China*

\*Corresponding author: [chuy@ms.xjb.ac.cn](mailto:chuy@ms.xjb.ac.cn) (Yu Chu), [lijunjie@ms.xjb.ac.cn](mailto:lijunjie@ms.xjb.ac.cn) (Junjie Li)

## CONTEXT

**Table S1** Atomic coordinates ( $\times 10^4$ ), equivalent isotropic displacement parameters ( $\text{\AA}^2 \times 10^3$ ) and bond valence calculations (BVSs) for  $\text{Pb}_6\text{Ba}_3\text{Si}_2\text{S}_8\text{I}_{10}$ .

**Table S2** Bond lengths [ $\text{\AA}$ ] and angles [deg] for  $\text{Pb}_6\text{Ba}_3\text{Si}_2\text{S}_8\text{I}_{10}$ .

**Table S3** Crystal systems, space groups, experimental band gaps and structural dimensions of known AM- and/or AEM-contained Pb-based thiohalides without C, H, O, N elements in ICSD.

**Figure S1** The EDS spectrum and mappings of  $\text{Pb}_6\text{Ba}_3\text{Si}_2\text{S}_8\text{I}_{10}$ .

**Figure S2** The distribution of Ba cations and I ions in the quasi-2D layers of  $\text{Pb}_6\text{Ba}_3\text{Si}_2\text{S}_8\text{I}_{10}$ .

**Figure S3** The IR absorption spectrum of  $\text{Pb}_6\text{Ba}_3\text{Si}_2\text{S}_8\text{I}_{10}$ .

**Figure S4** The Rietveld refinements of  $\text{Pb}_6\text{Ba}_3\text{Si}_2\text{S}_8\text{I}_{10}$  based on the powder XRD pattern.

**Figure S5** XRD patterns of  $\text{Pb}_6\text{Ba}_3\text{Si}_2\text{S}_8\text{I}_{10}$  before and after heating at 1130 K.

**Figure S6** Diffuse reflectance spectrum of  $\text{Pb}_6\text{Ba}_3\text{Si}_2\text{S}_8\text{I}_{10}$  plotted as  $[(k\nu F(R))]^{1/2}$  (indirect band gap), where  $F(R)$  is the Kubelka–Munk function. Dotted lines show the fit used to extract the band gap.

**Figure S7** The RID measurement result of  $\text{Pb}_6\text{Ba}_3\text{Si}_2\text{S}_8\text{I}_{10}$ .

**Table S1** Atomic coordinates ( $\times 10^4$ ), equivalent isotropic displacement parameters ( $\text{\AA}^2 \times 10^3$ ) and bond valence calculations (BVSs) for  $\text{Pb}_6\text{Ba}_3\text{Si}_2\text{S}_8\text{I}_{10}$ .

| Atom               | Wyckoff | $x$       | $y$        | $z$       | U(eq)     | BVS <sup>[a]</sup> |
|--------------------|---------|-----------|------------|-----------|-----------|--------------------|
| Ba(1)              | 18e     | 3333.33   | 3221.0(10) | 4166.67   | 45.8(3)   | 2.31               |
| Pb(1)              | 36f     | 3447.7(6) | 791.3(6)   | 4756.2(2) | 43.02(17) | 1.83               |
| Si(1)              | 12c     | 6666.67   | 3333.33    | 4474.7(6) | 15.8(8)   | 3.94               |
| S(1)               | 12c     | 6666.67   | 3333.33    | 4779.4(5) | 16.4(7)   | 2.12               |
| S(2)               | 36f     | 4603(3)   | 1297(3)    | 4381.9(3) | 20.3(5)   | 2.15               |
| I(1)               | 36f     | 3267.0(8) | 4112.2(9)  | 4749.3(2) | 33.8(2)   | 0.95               |
| I(2)               | 6b      | 0         | 0          | 5000      | 19.1(3)   | 0.79               |
| I(3)               | 6a      | 3333.33   | 6666.67    | 4166.67   | 78.0(10)  | 0.80               |
| I(4)               | 12c     | 0         | 0          | 4436.8(2) | 37.9(3)   | 0.79               |
| GII <sup>[b]</sup> |         |           |            |           | 0.178     |                    |

[a] The bond valence sum is calculated by bond-valence theory ( $S_{ij} = \exp[(R_0 - R)/B]$ , where  $R$  is an empirical constant,  $R_0$  is the length of bond I (in angstroms), and  $B = 0.37$ ).

[b] The global instability index (GII) calculated using:

$$G = \sqrt{\frac{\sum_{i=1}^n (BVS - v_i)}{N}}$$

where  $N$  is the number of atoms in the formula unit. The GII is calculated as 0.178 which is lower than 0.2 indicating the rationality of the structure from this side.

**Table S2** Bond lengths [Å] and angles [deg] for Pb<sub>6</sub>Ba<sub>3</sub>Si<sub>2</sub>S<sub>8</sub>I<sub>10</sub>.

|                     |            |                     |             |
|---------------------|------------|---------------------|-------------|
| Pb(1)-I(1)          | 3.3443(9)  | S(2)#2-Ba(1)-I(4)#3 | 81.45(4)    |
| Pb(1)-I(2)          | 3.5138(5)  | I(2)-Ba(1)-I(4)     | 114.051(15) |
| Ba(1)-S(2)          | 3.122(2)   | I(2)-Ba(1)-I(4)#4   | 114.051(15) |
| Ba(1)-S(2)#1        | 3.122(3)   | S(2)#5-Si(1)-S(1)   | 108.09(12)  |
| Ba(1)-S(2)#2        | 3.266(2)   | S(2)#2-Si(1)-S(1)   | 108.09(12)  |
| Ba(1)-S(2)#3        | 3.266(2)   | S(2)-Si(1)-S(1)     | 108.08(12)  |
| Ba(1)-I(4)          | 3.7346(7)  | S(2)-Si(1)-S(2)#5   | 110.82(12)  |
| Ba(1)-I(4)#4        | 3.7345(7)  | S(2)#5-Si(1)-S(2)   | 110.82(12)  |
| Ba(1)-I(3)          | 3.3742(10) | S(2)-Si(1)-S(2)#2   | 110.82(12)  |
| Si(1)-S(1)          | 2.152(5)   | I(1)-Pb(1)-I(2)     | 73.110(16)  |
| Pb(1)#5-S(1)        | 2.8832(6)  | S(1)-Pb(1)-I(2)     | 132.67(5)   |
| Pb(1)-S(1)          | 2.8832(6)  | S(1)-Pb(1)-I(1)     | 74.207(17)  |
| Pb(1)#3-S(1)        | 2.8832(6)  | S(2)-Pb(1)-I(2)     | 139.01(5)   |
| Si(1)-S(2)          | 2.112(3)   | S(2)-Pb(1)-I(1)     | 91.56(5)    |
| Pb(1)-S(2)          | 2.821(2)   | S(2)-Pb(1)-S(1)     | 74.47(8)    |
| S(2)#1-Ba(1)-S(2)   | 73.24(9)   | S(2)#1-Ba(1)-I(4)   | 70.15(5)    |
| S(2)-Ba(1)-S(2)#2   | 65.92(8)   | S(2)#1-Ba(1)-I(3)   | 81.45(4)    |
| S(2)#1-Ba(1)-S(2)#2 | 130.29(3)  | S(2)-Ba(1)-I(3)     | 143.38(4)   |
| S(2)#1-Ba(1)-S(2)#3 | 130.29(3)  | S(2)#2-Ba(1)-I(3)   | 143.38(4)   |
| S(2)#1-Ba(1)-S(2)#3 | 65.92(8)   | S(2)-Ba(1)-I(4)#4   | 70.16(5)    |
| S(2)#2-Ba(1)-S(2)#3 | 162.89(9)  | S(2)#3-Ba(1)-I(4)   | 68.76(4)    |
| S(2)#2-Ba(1)-I(4)   | 118.91(4)  | S(2)#1-Ba(1)-I(4)#4 | 71.66(5)    |
| S(2)#2-Ba(1)-I(4)#4 | 68.76(4)   | S(2)#3-Ba(1)-I(4)#4 | 118.91(4)   |
| S(2)-Ba(1)-I(4)     | 71.65(5)   |                     |             |

Symmetry transformations used to generate equivalent atoms:

#1  $2/3-x, 1/3-x+y, 5/6-z$     #2  $1+y-x, 1-x, +z$     #3  $-1/3-y+x, 1/3-y, 5/6-z$

#4  $2/3+y, 1/3+x, 5/6-z$     #5  $1-y, +x-y, +z$     #6  $-y, +x-y, +z$     #7  $+y-x, -x, +z$

#8  $1-y, 1+x-y, +z$     #9  $+y-x, 1-x, +z$

**Table S3** Crystal systems, space groups, experimental band gaps and structural dimensions of known AM- and/or AEM-contained Pb-based thiohalides without C, H, O, N elements in ICSD.

| Compounds                                                                      | Crystal system,<br>space group      | $E_g$ (eV) | Structural<br>dimension | Ref.      |
|--------------------------------------------------------------------------------|-------------------------------------|------------|-------------------------|-----------|
| Pb <sub>5</sub> Sn <sub>3</sub> Se <sub>10</sub> Cl <sub>2</sub>               | orthorhombic, <i>Cmmm</i>           | 1.44       | 3D                      | [1]       |
| Pb <sub>5</sub> Sn <sub>3</sub> S <sub>10</sub> Cl <sub>2</sub>                | orthorhombic, <i>Cmmm</i>           | 1.72       | 3D                      | [1]       |
| Pb <sub>3</sub> Se <sub>2</sub> Br <sub>2</sub>                                | cubic, $\bar{I}43d$                 | 1.48       | 3D                      | [2]       |
| Pb <sub>5</sub> S <sub>2</sub> I <sub>6</sub>                                  | monoclinic, <i>C2/m</i>             | 1.73       | 3D                      | [3]       |
| Pb <sub>4</sub> S <sub>3</sub> I <sub>2</sub>                                  | orthorhombic, <i>Pnma</i>           | 1.76       | 3D                      | [4]       |
| Pb <sub>4</sub> S <sub>3</sub> Br <sub>2</sub>                                 | orthorhombic, <i>Pnma</i>           | 1.91       | 3D                      | [4]       |
| Pb <sub>3</sub> S <sub>3</sub> Cl <sub>2</sub>                                 | cubic, $\bar{I}43d$                 | 2.02       | 3D                      | [4]       |
| Pb <sub>3</sub> SBrI <sub>3</sub>                                              | monoclinic, <i>P2<sub>1</sub>/m</i> | 2.16       | 3D                      | [5]       |
| Pb <sub>2</sub> SbS <sub>2</sub> I <sub>3</sub>                                | orthorhombic, <i>Cmmm</i>           | 2.19       | 3D                      | [6]       |
| [K <sub>2</sub> PbI][Ga <sub>7</sub> S <sub>12</sub> ]                         | orthorhombic, <i>Imm2</i>           | 2.41       | 3D                      | [7]       |
| [K <sub>2</sub> PbBr][Ga <sub>7</sub> S <sub>12</sub> ]                        | orthorhombic, <i>Imm2</i>           | 2.49       | 3D                      | [7]       |
| [K <sub>2</sub> PbCl][Ga <sub>7</sub> S <sub>12</sub> ]                        | orthorhombic, <i>Imm2</i>           | 2.54       | 3D                      | [7]       |
| [Na <sub>2</sub> PbI][Ga <sub>7</sub> S <sub>12</sub> ]                        | orthorhombic, <i>Imm2</i>           | 2.53       | 3D                      | [8]       |
| Pb <sub>3,5</sub> GeS <sub>4</sub> Br <sub>3</sub>                             | hexagonal, <i>P6<sub>3</sub></i>    | 2.6        | 3D                      | [9]       |
| Pb <sub>4</sub> SeBr <sub>6</sub>                                              | orthorhombic, <i>Imm2</i>           | 2.62       | 3D                      | [10]      |
| Pb <sub>6</sub> Ba <sub>3</sub> Si <sub>2</sub> S <sub>8</sub> I <sub>10</sub> | trigonal, $R\bar{3}c$               | 2.80       | 2D                      | This work |

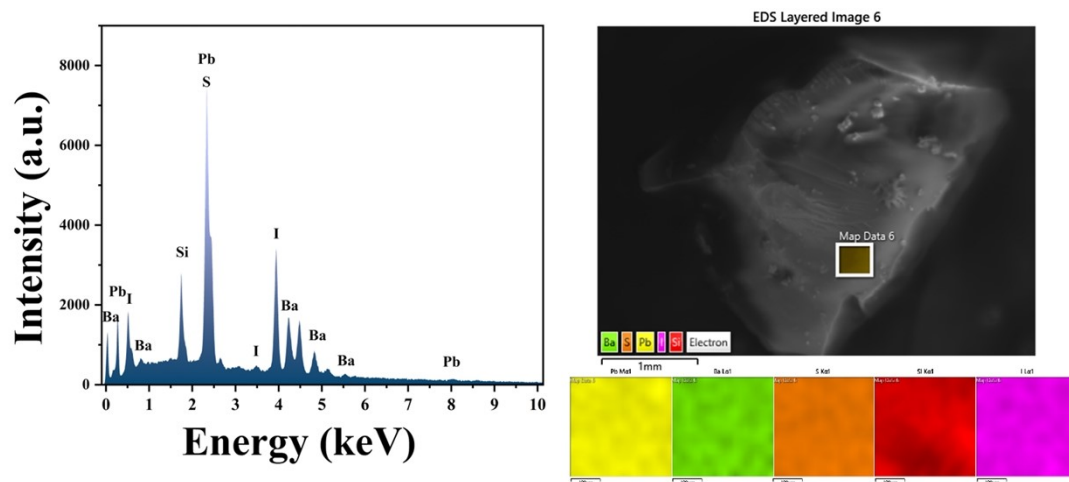

Figure S1 The EDS spectrum and mappings of  $\text{Pb}_6\text{Ba}_3\text{Si}_2\text{S}_8\text{I}_{10}$ .

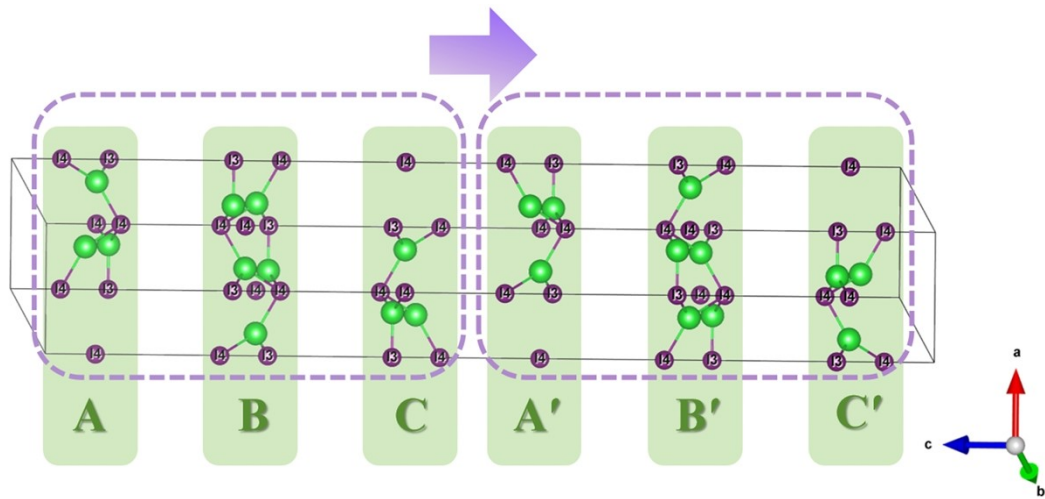

**Figure S2** The distribution of Ba and I atoms in the quasi-2D layers of  $\text{Pb}_6\text{Ba}_3\text{Si}_2\text{S}_8\text{I}_{10}$ .

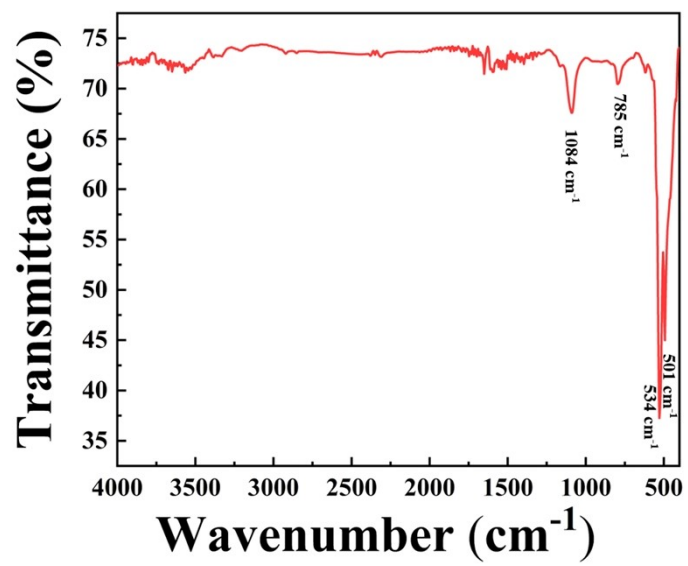

Figure S3 The IR absorption spectrum of  $\text{Pb}_6\text{Ba}_3\text{Si}_2\text{S}_8\text{I}_{10}$ .



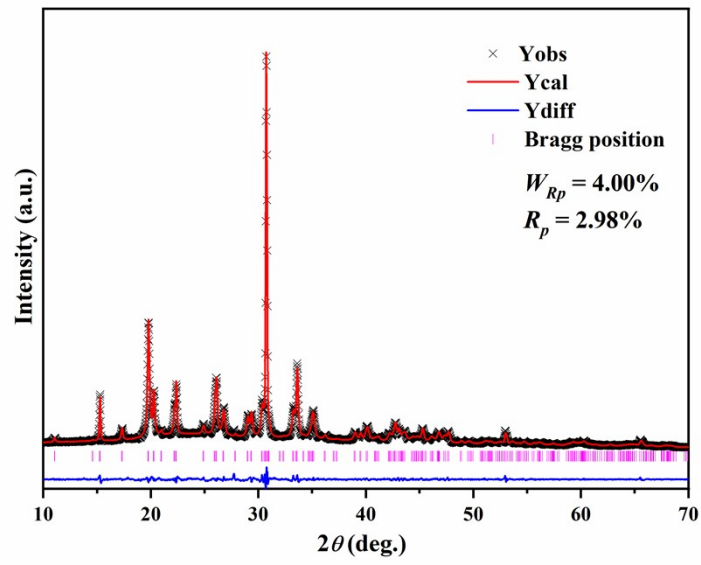

**Figure S4** The Rietveld refinements of  $\text{Pb}_6\text{Ba}_3\text{Si}_2\text{S}_8\text{I}_{10}$  based on the powder XRD pattern.

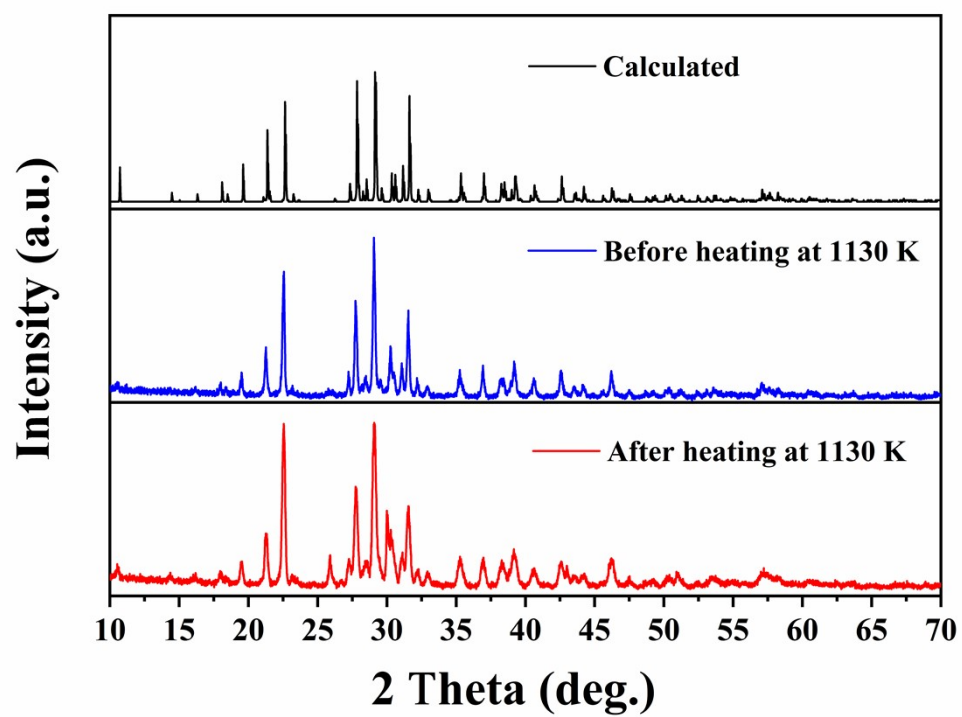

**Figure S5** XRD patterns of  $\text{Pb}_6\text{Ba}_3\text{Si}_2\text{S}_8\text{I}_{10}$  before and after heating at 1130 K.

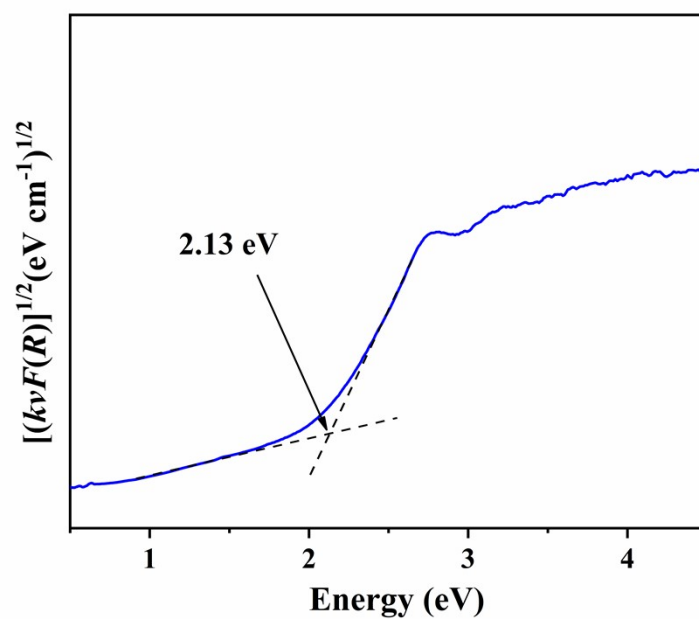

**Figure S6** Diffuse reflectance spectrum of  $\text{Pb}_6\text{Ba}_3\text{Si}_2\text{S}_8\text{I}_{10}$  plotted as  $[(k\nu F(R))^{1/2}]$  (indirect band gap), where  $F(R)$  is the Kubelka-Munk function. Dotted lines show the fit used to extract the band gap.

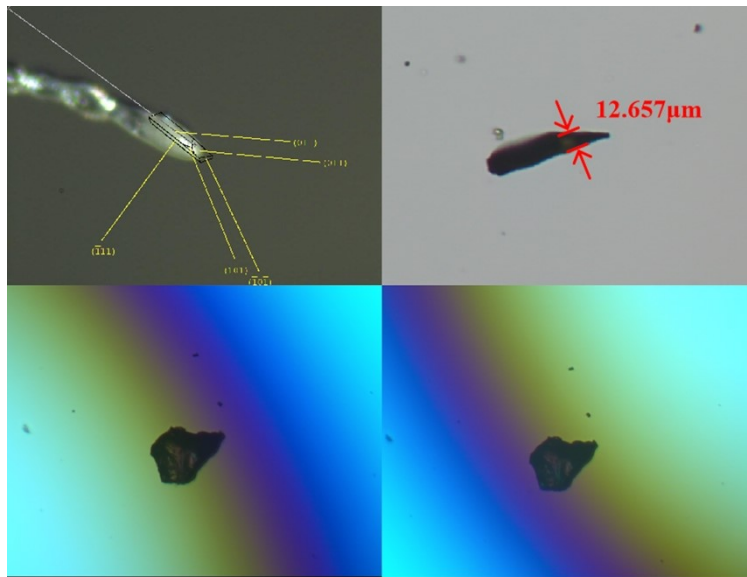

**Figure S7** The RID measurement result of  $\text{Pb}_6\text{Ba}_3\text{Si}_2\text{S}_8\text{I}_{10}$ .

## References

- [1] L.-T. Jiang, M.-Z. Li, X.-M. Jiang, B.-W. Liu and G.-C. Guo, *Dalton Trans.*, 2022, **51**, 6638-6645.
- [2] D. Ni, S. Guo, K. M. Powderly, R. Zhong and R. J. Cava, *J. Solid State Chem.*, 2019, **280**, 120982.
- [3] H. Wang, G. Chen, J. Xu, Y. Xu and Q. Yang, *Cryst. Growth Des.*, 2018, **18**, 1987-1994.
- [4] S. Toso, Q. A. Akkerman, B. Martín-García, M. Prato, J. Zito, I. Infante, Z. Dang, A. Moliterni, C. Giannini, E. Bladt, I. Lobato, J. Ramade, S. Bals, J. Buha, D. Spirito, E. Mugnaioli, M. Gemmi and L. Manna, *J. Am. Chem. Soc.*, 2020, **142**, 10198–10211.
- [5] M. Yan, R.-L. Tang, W. Zhou, W. Liu and S.-P. Guo, *Dalton Trans.*, 2022, **51**, 12921-12927.
- [6] R. Nie, B. Kim, S.-T. Hong and S. I. Seok, *ACS Energy Lett.*, 2018, **3**, 2376-2382.
- [7] W.-F. Chen, B.-W. Liu, S.-M. Pei, X.-M. Jiang and G.-C. Guo, *Adv. Sci.*, 2023, **10**, 2207630.
- [8] Z.-X. Wu, W.-F. Chen, X.-M. Jiang, B.-W. Liu and G.-C. Guo, *Chem. Mater.*, 2024, **36**, 3444-3451.
- [9] J. Zhou, H. Wang, J. Liu, X. Su, Y. Chu, J. Qu and X. Jiang, *Inorg. Chem. Front.*, 2024, **11**, 2681-2689.
- [10] J. Wang, H. Wu, H. Yu, Z. Hu, J. Wang and Y. Wu, *Adv. Opt. Mater.*, 2022, **10**, 2102673.
